# Supplementary material
Source: Springer Nature journal article supplement (https://www.springermedizin.de/resource/supplementary/13012_2013_733_MOESM1_ESM.pdf/9630560)
Supplement: MOESM1 [file 9630560]

## Glargine Titration Schedule

Initial starting dose of glargine will be 10 units administered at bed-time though the insulin dose and its timing can be modified at the discretion of the medical practitioner.

Changes to insulin dosing are to be made at visits to clinic/or via telephone, or by Accu-Chek self-titration tool each 3 days for those patients deemed appropriate for this.

| Fasting Glucose (average of last 3 days) | Algorithm for Insulin Glargine Titration |
|------------------------------------------|------------------------------------------|
| <4.0mmol/L                               | Reduce Glargine dose by 2-4 Units        |
| 4.0 -7.0mmol/L                           | Leave Glargine dose unchanged            |
| 7.1-8.0mmol/L                            | Add 2 Units Glargine                     |
| 8.1-10.0mmol/L                           | Add 4 Units Glargine                     |
| 10mmol/L or greater                      | Add 6 Units Glargine                     |

## Glulisine Titration Schedule

Initial starting dose of glulisine will be 4 units administered with the meal at which 2 hour post-prandial glucose levels are most elevated above the target range. The initial insulin dose can be modified at the discretion of the medical practitioner.

Changes to insulin dosing are to be made at visits to clinic/or via telephone, or by Accu-Chek self-titration tool each 3 days for those patients deemed appropriate for this.

| 2hr Post-Prandial Glucose (average of last 3 days.) | Algorithm for Insulin Glulisine Titration  |
|-----------------------------------------------------|--------------------------------------------|
| <4.5mmol/L                                          | Reduce Glulisine dose by 2-4 Units         |
| 4.5 -7.0 mmol/L                                     | Leave Glulisine dose unchanged             |
| 7.0-10.0mmol/L                                      | Add 0-2Units Glulisine (discretion of Dr)  |
| 10.0-12.0mmol/L                                     | Add 2 Units Glulisine                      |
| 12.1-14.0mmol/L                                     | Add 4-6 Units Glulisine                    |
| >14.0mmol/L                                         | Add 6-8 Units Glulisine (discretion of Dr) |
